# Supplementary material
Source: publisher site journal article supplement (https://www.dovepress.com/article/554174)
Supplement: Supplementary file 1 [file 554174%20Revised%20Supplementary.docx]

Table S1. Knowledge dimension of the participants

| **K1 Have you heard of painless gastrointestinal endoscopy?** | **A**  **heard of** | **B not heard of** | **C** **not sure** |  |
| --- | --- | --- | --- | --- |
| 446(94.5) | 20(4.2) | 6(1.3) | / |
| **K2 Have you heard that traditional Chinese medicine (acupuncture, electroacupuncture) can alleviate the pain during gastrointestinal endoscopy?** | **A**  **heard of** | **B not heard of** | **C** **not sure** |  |
| 105(22.2) | 337(71.4) | 30(6.4) | / |
| **K3 What symptoms or side effects do you think gastrointestinal endoscopy may cause?** | **A**  **yes** | **B no** | **C** **not sure** |  |
| **—Malignant vomiting** | 233(49.4) | 55(11.7) | 184(39.0) | / |
| **Tearing of the gastrointestinal mucosa** | 137(29.0) | 90(19.1) | 245(51.9) | / |
| **Gastrointestinal perforation** | 108(22.9) | 106(22.5) | 258(54.7) | / |
| **Gastrointestinal bleeding** | 131(27.8) | 96(20.3) | 245(51.9) | / |
| **Arrhythmia** | 101(21.4) | 98(20.8) | 273(57.8) | / |
| **K4 Do you know what anesthesia is typically used for painless gastrointestinal endoscopy?** | a. Local Anesthesia | b. General Anesthesia | c. No Anesthesia Required | d. Not Sure |
| 62(13.1) | 309(65.5) | 4(0.8) | 97(20.6) |
| **K5 Are you aware that individuals with severe hypertension, severe arrhythmia, unstable angina, and acute respiratory infections, as well as during acute asthma attacks, cannot undergo painless gastrointestinal endoscopy?** | **A**  **yes** | **B no** | **C** **not sure** |  |
| 219(46.4) | 119(25.2) | 134(28.4) | / |
| **K6 Hypertensive patients need to stabilize their blood pressure before undergoing painless gastrointestinal endoscopy.** | **A**  **yes** | **B no** | **C** **not sure** |  |
| 301(63.8) | 21(4.4) | 150(31.8) | / |
| **K7 Do you believe that patients can hear external sounds during painless gastrointestinal endoscopy?** | A. Can Hear External Sounds | B. Cannot Hear External Sounds | C. not sure |  |
| 44(9.3) | 293(62.1) | 135(28.6) | / |
| **K8 Do you believe that patients are conscious during painless gastrointestinal endoscopy?** | A. conscious | B. unconscious | C. not sure |  |
| 63(13.3) | 309(65.5) | 100(21.2) | / |
| **K9 How long do you think the anesthesia for painless gastrointestinal endoscopy generally lasts?** | A. within half an hour | B. around 1 hour | C. more than 1 hour | D. not sure |
| 231(48.9) | 73(15.5) | 12(2.5) | 156(33.1) |
| **K10 Are you aware that painless gastrointestinal endoscopy may have anesthesia-related side effects?** | **A**  **yes** | **B no** | **C** **not sure** |  |
| 176(37.3) | 50(10.6) | 246(52.1) | / |

Table S2. Attitude dimension of the participants

|  | **Very scared** | **More scared** | **Neutrality** | **Not too scared** | **Not afraid** |
| --- | --- | --- | --- | --- | --- |
| **A1 Are you afraid of undergoing gastrointestinal endoscopy?** | 59(12.5) | 165(35.0) | 134(28.4) | 65(13.8) | 49(10.4) |
|  | Very safe | Somewhat safe | Neutral | Not very safe | Unsafe |
| **A2 Is painless gastrointestinal endoscopy a safe examination method?** | 98(20.8) | 224(47.5) | 140(29.7) | 6(1.3) | 4(0.8) |
|  | Very concerned | Somewhat concerned | Neutral | Not very concerned | Not concerned |
| **A3 Are you concerned that painless gastrointestinal endoscopy may not alleviate nausea, pain, or leave you feeling pain after the procedure?** | 42(8.9) | 135(28.6) | 154(32.6) | 99(21.0) | 42(8.9) |
|  | Significantly reduced fear | Has some calming effect | Neutral | Doesn't reduce fear much | Does not reduce fear at all |
| **A4 Do you believe that painless endoscopy has reduced your fear of endoscopic examinations?** | 175(37.1) | 171(36.2) | 110(23.3) | 13(2.8) | 3(0.6) |
|  | Strongly agree | Somewhat agree | Neutral | Somewhat disagree | Disagree |
| **A5 Do you think that painless gastrointestinal endoscopy can shorten the examination time, making the procedure smoother?** | 146(30.9) | 184(39.0) | 128(27.1) | 9(1.9) | 5(1.1) |
|  | Very worried | Somewhat worried | Neutral | Not very worried | Not worried |
| **A6 Are you worried that during painless gastrointestinal endoscopy, the doctor may not conduct a thorough examination and rush through it?** | 37(7.8) | 100(21.2) | 149(31.6) | 118(25.0) | 68(14.4) |
|  | Strongly agree | Somewhat agree | Neutral | Somewhat disagree | Strongly disagree |
| **A7 Do you believe that the results of painless gastrointestinal endoscopy are more accurate?** | 96(20.3) | 181(38.3) | 170(36.0) | 21(4.4) | 4(0.8) |
|  | Very worried | Somewhat worried | Neutral | Not very worried | Not worried |
| **A8 Are you concerned that after being anesthetized for painless endoscopy, the doctor might inform your family of the examination results without informing you?** | 16(3.4) | 46(9.7) | 158(33.5) | 151(32.0) | 101(21.4) |
|  | Very worried | Somewhat worried | Neutral | Not very worried | Not worried |
| **A9 Are you worried about not waking up after the anesthesia for painless gastrointestinal endoscopy?** | 24(5.1) | 63(13.3) | 131(27.8) | 144(30.5) | 110(23.3) |
|  | Very worried | Somewhat worried | Neutral | Not very worried | Not worried |
| **A10 Are you concerned that anesthesia for painless gastrointestinal endoscopy may lead to a decrease in intelligence or cognitive abilities?** | 43(9.1) | 87(18.4) | 150(31.8) | 105(22.2) | 87(18.4) |
|  | Very concerned | Somewhat concerned | Neutral | Not very concerned | Not concerned |
| **A11 Are you worried about the cost of painless gastrointestinal endoscopy?** | 17(3.6) | 72(15.3) | 153(32.4) | 119(25.2) | 111(23.5) |
|  | Very willing | Somewhat willing | Neutral | Not very willing | Unwilling |
| **A12 Are you willing to try traditional Chinese medicine (acupuncture) therapy to reduce the pain of gastrointestinal endoscopy and thereby reduce the amount of anesthesia used?** | 70(14.8) | 123(26.1) | 225(47.7) | 38(8.1) | 16(3.4) |

Table S3. Practice dimension of the participants

|  | Definitely will | Usually | Maybe | Not really | Will not |
| --- | --- | --- | --- | --- | --- |
| **P1 Before choosing painless gastrointestinal endoscopy, do you carefully assess or ask the doctor whether your health condition meets the requirements?** | 233(49.4) | 141(29.9) | 75(15.9) | 19(4.0) | 4(0.8) |
|  | The nausea and discomfort prevent me | The nausea and discomfort make me hesitant | Although uncomfortable, I reluctantly went | Although uncomfortable, I still get the check-up promptly | When I need a gastroscopy and colonoscopy, I have no hesitation |
| **P4 Do you delay going to the hospital for gastrointestinal endoscopy due to the discomfort and nausea associated with the fear of the examination?** | 47(10.0) | 93(19.7) | 110(23.3) | 80(16.9) | 142(30.1) |
|  | Definitely will | Usually will | Neutral | Not very likely | Will not |
| **P5 Do you proactively seek information about the risks and possible complications of painless gastrointestinal endoscopy?** | 120(25.4) | 157(33.3) | 136(28.8) | 51(10.8) | 8(1.7) |
|  | Strongly recommend | Somewhat recommend | Neutral | Not very likely to recommend | Do not recommend |
| **P6 Would you recommend painless gastrointestinal endoscopy to people around you who need to undergo the examination?** | 119(25.2) | 183(38.8) | 157(33.3) | 11(2.3) | 2(0.4) |
|  | Often seek information | Occasionally seek information | Take note if I come across it | Not very likely to seek information | Have not sought information |
| **P7 Have you actively explored the role of traditional Chinese medicine (acupuncture) therapy in alleviating nausea and vomiting during gastrointestinal endoscopy?** | 22(4.7) | 96(20.3) | 113(23.9) | 81(17.2) | 160(33.9) |
| **P2 If you undergo gastrointestinal endoscopy, which type would you choose? (Open-ended question)** | a. Painless Gastrointestinal Endoscopy | b. Regular Gastrointestinal Endoscopy | c. not sure |  |  |
| 435(92.2) | 13(2.8) | 24(5.1) | / | / |
| **P3 Is "age" a consideration for you in choosing painless gastrointestinal endoscopy? (Open-ended question)** | 1. I would definitely consider age | b. I would generally consider age | c. I might consider age | d. I would not consider age much | e. I would not consider age |
| 125(26.5) | 95(20.1) | 82(17.4) | 96(20.3) | 74(15.7) |

Table S4. Univariate and multivariate logistic regression for knowledge

| **Cutoff value：≥7 /＜7** |  | **Univariate** | | **multivariate (p＜0.25)** | |
| --- | --- | --- | --- | --- | --- |
|  | **No.** | **OR(95%CI)** | **p** | **OR(95%CI)** | **p** |
| **Gender** |  |  |  |  |  |
| Male | 93/199 | ref. |  |  |  |
| Female | 148/273 | 1.350(0.936, 1.947) | 0.109 |  |  |
| **Age** |  |  |  |  |  |
| 30 years and below | 43/86 | ref. |  |  |  |
| 31-40 years | 105/191 | 1.221(0.733, 2.033) | 0.443 |  |  |
| 41-50 years | 59/121 | 0.952(0.547, 1.654) | 0.860 |  |  |
| 51-60 years | 20/34 | 1.429(0.640, 3.190) | 0.384 |  |  |
| Above 60 years | 14/40 | 0.538(0.248, 1.169) | 0.118 |  |  |
| **Marital status** |  |  |  |  |  |
| Married | 165/324 | ref. |  |  |  |
| Other | 76/148 | 1.017(0.689, 1.501) | 0.932 |  |  |
| **Education** |  |  |  |  |  |
| Junior high school and below | 16/40 | ref. |  | ref. |  |
| High school/technical school | 21/63 | 0.750(0.330, 1.705) | 0.492 | 0.871(0.370, 2.051) | 0.752 |
| Bachelor’s /associate degree | 162/306 | 1.687(0.862, 3.302) | 0.127 | 1.903(0.949, 3.813) | 0.070 |
| Master’s and above | 42/63 | 3.000(1.320, 6.820) | 0.009 | 4.253(1.792, 10.095) | 0.001 |
| **Occupation** |  |  |  |  |  |
| Other | 219/447 | ref. |  | ref. |  |
| Medical personnel | 22/25 | 7.635(2.253, 25.872) | 0.001 | 8.099(2.321, 28.268) | 0.001 |
| **Monthly income** |  |  |  |  |  |
| ＜3000 Yuan | 16/39 | ref. |  |  |  |
| 3000-5000 Yuan | 32/71 | 1.179(0.535, 2.601) | 0.683 |  |  |
| 5000-10000 Yuan | 78/153 | 1.495(0.733, 3.048) | 0.269 |  |  |
| ＞10000 Yuan | 115/209 | 1.759(0.879, 3.520) | 0.111 |  |  |
| **Presence of Cardiovascular Disease** |  |  |  |  |  |
| Yes | 29/53 | ref. |  |  |  |
| No | 204/392 | 0.898(0.505, 1.598) | 0.714 |  |  |
| Uncertain | 8/27 | 0.348(0.130, 0.935) | 0.036 |  |  |
| **History of Gastrointestinal Endoscopy** |  |  |  |  |  |
| Yes | 136/234 | ref. |  |  |  |
| No | 105/238 | 0.569(0.395, 0.819) | 0.002 |  |  |
| **History of General Anesthesia for Endoscopy** |  |  |  |  |  |
| Yes | 152/248 | ref. |  | ref. |  |
| No | 89/224 | 0.416(0.288, 0.603) | ＜0.001 | 0.364(0.245, 0.540) | ＜0.001 |
| **Type of Gastrointestinal Endoscopy** |  |  |  |  |  |
| Painless | 237/458 | ref. |  |  |  |
| Non-painless | 4/14 | 0.373(0.115, 1.207) | 0.100 |  |  |

Table S5. Univariate and multivariate logistic regression for attitude

| **Cutoff value：≥41 /＜41** |  | **Univariate** | | **multivariate (p＜0.25)** | |
| --- | --- | --- | --- | --- | --- |
|  | **No.** | **OR(95%CI)** | **p** | **OR(95%CI)** | **p** |
| **Gender** |  |  |  |  |  |
| Male | 105/199 | ref. |  |  |  |
| Female | 135/273 | 0.876(0.608, 1.262) | 0.477 |  |  |
| **Age** |  |  |  |  |  |
| 30 years and below | 33/86 | ref. |  |  |  |
| 31-40 years | 97/191 | 1.657(0.986, 2.785) | 0.056 |  |  |
| 41-50 years | 69/121 | 2.131(1.212, 3.747) | 0.009 |  |  |
| 51-60 years | 23/34 | 3.358(1.450, 7.776) | 0.005 |  |  |
| Above 60 years | 18/40 | 1.314(0.615, 2.809) | 0.481 |  |  |
| **Marital status** |  |  |  |  |  |
| Married | 180/324 | ref. |  | ref. |  |
| Other | 60/148 | 0.545(0.368, 0.809) | 0.003 | 0.595(0.397, 0.893) | 0.012 |
| **Education** |  |  |  |  |  |
| Junior high school and below | 23/40 | ref. |  |  |  |
| High school/technical school | 32/63 | 0.763(0.343, 1.695) | 0.506 |  |  |
| Bachelor’s /associate degree | 151/306 | 0.720(0.370, 1.401) | 0.334 |  |  |
| Master’s and above | 34/63 | 0.867(0.390, 1.927) | 0.725 |  |  |
| **Occupation** |  |  |  |  |  |
| Other | 225/447 | ref. |  |  |  |
| Medical personnel | 15/25 | 1.480(0.651, 3.365) | 0.350 |  |  |
| **Monthly income** |  |  |  |  |  |
| ＜3000 Yuan | 18/39 | ref. |  |  |  |
| 3000-5000 Yuan | 26/71 | 0.674(0.305, 1.490) | 0.330 |  |  |
| 5000-10000 Yuan | 83/153 | 1.383(0.683, 2.801) | 0.367 |  |  |
| ＞10000 Yuan | 113/209 | 1.373(0.692, 2.726) | 0.365 |  |  |
| **Presence of Cardiovascular Disease** |  |  |  |  |  |
| Yes | 25/53 | ref. |  | ref. |  |
| No | 207/392 | 1.253(0.705, 2.226) | 0.441 | 1.340(0.745, 2.409) | 0.328 |
| Uncertain | 8/27 | 0.472(0.176, 1.265) | 0.135 | 0.500(0.183, 1.366) | 0.176 |
| **History of Gastrointestinal Endoscopy** |  |  |  |  |  |
| Yes | 138/234 | ref. |  | ref. |  |
| No | 102/238 | 0.522(0.362, 0.752) | ＜0.001 | 0.557(0.383, 0.809) | 0.002 |
| **History of General Anesthesia for Endoscopy** |  |  |  |  |  |
| Yes | 139/248 | ref. |  |  |  |
| No | 101/224 | 0.644(0.448, 0.926) | 0.018 |  |  |
| **Type of Gastrointestinal Endoscopy** |  |  |  |  |  |
| Painless | 233/458 | ref. |  |  |  |
| Non-painless | 7/14 | 0.966(0.333, 2.797) | 0.949 |  |  |

Table S6. Univariate and multivariate logistic regression for practice

| **Cutoff value：≥17 /＜17** |  | **Univariate** | | **multivariate (p＜0.25)** | |
| --- | --- | --- | --- | --- | --- |
|  | **No.** | **OR(95%CI)** | **P** | **OR(95%CI)** | **p** |
| **Gender** |  |  |  |  |  |
| Male | 127/199 | ref. |  |  |  |
| Female | 175/273 | 1.012(0.692, 1.481) | 0.949 |  |  |
| **Age** |  |  |  |  |  |
| 30 years and below | 51/86 | ref. |  |  |  |
| 31-40 years | 121/191 | 1.186(0.704, 1.998) | 0.521 |  |  |
| 41-50 years | 84/121 | 1.558(0.874, 2.778) | 0.133 |  |  |
| 51-60 years | 23/34 | 1.435(0.621, 3.315) | 0.398 |  |  |
| Above 60 years | 23/40 | 0.928(0.434, 1.986) | 0.848 |  |  |
| **Marital status** |  |  |  |  |  |
| Married | 216/324 | ref. |  | ref. |  |
| Other | 86/148 | 0.694(0.465, 1.035) | 0.073 | 0.703(0.470, 1.050) | 0.085 |
| **Education** |  |  |  |  |  |
| Junior high school and below | 24/40 | ref. |  |  |  |
| High school/technical school | 43/63 | 1.433(0.628, 3.273) | 0.393 |  |  |
| Bachelor’s /associate degree | 199/306 | 1.240(0.631, 2.435) | 0.532 |  |  |
| Master’s and above | 36/63 | 0.889(0.397, 1.990) | 0.774 |  |  |
| **Occupation** |  |  |  |  |  |
| Other | 281/447 | ref. |  | ref. |  |
| Medical personnel | 21/25 | 3.101(1.047, 9.191) | 0.041 | 3.032(1.021, 9.002) | 0.046 |
| **Monthly income** |  |  |  |  |  |
| ＜3000 Yuan | 23/39 | ref. |  |  |  |
| 3000-5000 Yuan | 37/71 | 0.757(0.344, 1.668) | 0.490 |  |  |
| 5000-10000 Yuan | 103/153 | 1.433(0.696, 2.950) | 0.329 |  |  |
| ＞10000 Yuan | 139/209 | 1.381(0.686, 2.781) | 0.366 |  |  |
| **Presence of Cardiovascular Disease** |  |  |  |  |  |
| Yes | 29/53 | ref. |  |  |  |
| No | 257/392 | 1.575(0.882, 2.813) | 0.124 |  |  |
| Uncertain | 16/27 | 1.204(0.471, 3.079) | 0.699 |  |  |
| **History of Gastrointestinal Endoscopy** |  |  |  |  |  |
| Yes | 154/234 | ref. |  |  |  |
| No | 148/238 | 0.854(0.586, 1.245) | 0.412 |  |  |
| **History of General Anesthesia for Endoscopy** |  |  |  |  |  |
| Yes | 162/248 | ref. |  |  |  |
| No | 140/224 | 0.885(0.607, 1.289) | 0.524 |  |  |
| **Type of Gastrointestinal Endoscopy** |  |  |  |  |  |
| Painless | 292/458 | ref. |  |  |  |
| Non-painless | 10/14 | 1.421(0.439, 4.603) | 0.558 |  |  |

Figure S1 The questionnaire
